# Supplementary material for: Quality of Life in Amyotrophic Lateral Sclerosis Patients and Care Burden of Caregivers in Sardinia during COVID-19 Pandemic
Source: MDPI journal article supplement (doi:10.3390/healthcare11111641), 2023-06-03
Supplement: s1 [file s1]

**Section S1 - Questionario sulla qualità della vita specifico per la Sclerosi Laterale Amiotrofica-  
Forma breve (ALSSQOL-SF) adattato per periodo dell'emergenza COVID-19**

Età ≤40 ☐ 41 -50 ☐ 51-60 ☐ 61-70 ☐ 71-80 ☐ > 80 ☐

Sesso M ☐ F ☐

**Indicazioni:**

Le domande del questionario iniziano con una dichiarazione seguita da due risposte opposte. I numeri si estendono da una risposta estrema al suo contrario. Indichi il numero compreso tra 0 e 10 che rappresenta di più il suo stato nell'ultimo mese. Non ci sono risposte giuste o sbagliate. Le risposte completamente oneste saranno molto utili. È possibile non rispondere alla domanda se dovesse ritenerla troppo personale.

Le chiedo di valutare la sua qualità di vita nell'ultimo mese (30 giorni):

|                                                                                                                                                        | Pessima                | Ottima |
|--------------------------------------------------------------------------------------------------------------------------------------------------------|------------------------|--------|
| Considerando tutte le parti della mia vita – fisica, emotiva, sociale, spirituale e finanziaria – nell'ultimo mese, la qualità della mia vita è stata: | 0 1 2 3 4 5 6 7 8 9 10 |        |

Le chiedo di indicare per le seguenti affermazioni quanto è d'accordo o in disaccordo con ognuna di esse.

|   | Fortemente in disaccordo                                 | Fortemente d'accordo |
|---|----------------------------------------------------------|----------------------|
| 1 | Ho provato dolore 0 1 2 3 4 5 6 7 8 9 10                 |                      |
| 2 | Ho provato stanchezza 0 1 2 3 4 5 6 7 8 9 10             |                      |
| 3 | Ho avuto un'eccessiva salivazione 0 1 2 3 4 5 6 7 8 9 10 |                      |

|    |                                                                      |   |   |   |   |   |   |   |   |   |   |    |
|----|----------------------------------------------------------------------|---|---|---|---|---|---|---|---|---|---|----|
| 4  | Ho avuto difficoltà a comunicare                                     | 0 | 1 | 2 | 3 | 4 | 5 | 6 | 7 | 8 | 9 | 10 |
| 5  | Ho avuto problemi con la forza e la capacità di spostarmi            | 0 | 1 | 2 | 3 | 4 | 5 | 6 | 7 | 8 | 9 | 10 |
| 6  | Ho avuto problemi a dormire                                          | 0 | 1 | 2 | 3 | 4 | 5 | 6 | 7 | 8 | 9 | 10 |
| 7  | Sono stato in un pessimo stato fisico                                | 0 | 1 | 2 | 3 | 4 | 5 | 6 | 7 | 8 | 9 | 10 |
| 8  | Il mondo è stato attento e sensibile ai miei bisogni                 | 0 | 1 | 2 | 3 | 4 | 5 | 6 | 7 | 8 | 9 | 10 |
| 9  | Mi sono sentito sostenuto                                            | 0 | 1 | 2 | 3 | 4 | 5 | 6 | 7 | 8 | 9 | 10 |
| 10 | Mi sono sentito depresso                                             | 0 | 1 | 2 | 3 | 4 | 5 | 6 | 7 | 8 | 9 | 10 |
| 11 | Le relazioni con le persone a me più vicine sono state soddisfacenti | 0 | 1 | 2 | 3 | 4 | 5 | 6 | 7 | 8 | 9 | 10 |
| 12 | La mia religione è stata per me una fonte di forza o conforto        | 0 | 1 | 2 | 3 | 4 | 5 | 6 | 7 | 8 | 9 | 10 |
| 13 | Mi considero religioso o spirituale                                  | 0 | 1 | 2 | 3 | 4 | 5 | 6 | 7 | 8 | 9 | 10 |
| 14 | Mi sono sentito senza speranze                                       | 0 | 1 | 2 | 3 | 4 | 5 | 6 | 7 | 8 | 9 | 10 |
| 15 | Mi sono sentito triste                                               | 0 | 1 | 2 | 3 | 4 | 5 | 6 | 7 | 8 | 9 | 10 |
| 16 | Ho apprezzato la bellezza di ciò che mi circonda                     | 0 | 1 | 2 | 3 | 4 | 5 | 6 | 7 | 8 | 9 | 10 |
| 17 | Ho avuto un forte desiderio di comunicare le mie emozioni            | 0 | 1 | 2 | 3 | 4 | 5 | 6 | 7 | 8 | 9 | 10 |
| 18 | Ho comunicato le mie emozioni agli altri                             | 0 | 1 | 2 | 3 | 4 | 5 | 6 | 7 | 8 | 9 | 10 |
| 19 | Ho avuto un forte desiderio di contatto fisico                       | 0 | 1 | 2 | 3 | 4 | 5 | 6 | 7 | 8 | 9 | 10 |
| 20 | Ho avuto un contatto fisico con gli altri                            | 0 | 1 | 2 | 3 | 4 | 5 | 6 | 7 | 8 | 9 | 10 |
| 21 | Mi sono impegnato per altre persone nella mia comunità               | 0 | 1 | 2 | 3 | 4 | 5 | 6 | 7 | 8 | 9 | 10 |
| 22 | Ho apprezzato il tempo trascorso con altre                           | 0 | 1 | 2 | 3 | 4 | 5 | 6 | 7 | 8 | 9 | 10 |

Vorremmo infine porle alcune brevi domande relative al periodo dell'emergenza COVID-19

|    |                                                                    | Fortemente<br>in disaccordo |   |   |   |   |   |   |   |   |   | Fortemente<br>d'accordo |
|----|--------------------------------------------------------------------|-----------------------------|---|---|---|---|---|---|---|---|---|-------------------------|
| 23 | L'emergenza COVID-19 ha peggiorato la mia qualità di vita          | 0                           | 1 | 2 | 3 | 4 | 5 | 6 | 7 | 8 | 9 | 10                      |
| 24 | Mi sono sentito solo rispetto a prima dell'emergenza               | 0                           | 1 | 2 | 3 | 4 | 5 | 6 | 7 | 8 | 9 | 10                      |
| 25 | Ho avuto cure adeguate durante l'emergenza                         | 0                           | 1 | 2 | 3 | 4 | 5 | 6 | 7 | 8 | 9 | 10                      |
| 26 | Ho avuto supporto psicologico adeguato                             | 0                           | 1 | 2 | 3 | 4 | 5 | 6 | 7 | 8 | 9 | 10                      |
| 27 | Ho avvertito di più la mancanza di un contatto fisico              | 0                           | 1 | 2 | 3 | 4 | 5 | 6 | 7 | 8 | 9 | 10                      |
| 28 | Non ho potuto svolgere alcune attività che per me erano importanti | 0                           | 1 | 2 | 3 | 4 | 5 | 6 | 7 | 8 | 9 | 10                      |
| 29 | Il rapporto con le persone che mi assistono è stato più difficile  | 0                           | 1 | 2 | 3 | 4 | 5 | 6 | 7 | 8 | 9 | 10                      |
| 30 | Ho avuto maggiori difficoltà a comunicare                          | 0                           | 1 | 2 | 3 | 4 | 5 | 6 | 7 | 8 | 9 | 10                      |

**Section S2 - Zarit Burden Interview (ZBI) adattato per periodo dell'emergenza COVID-19**

Età \_\_\_\_\_

Sesso M ☐ F ☐

Data diagnosi familiare (mese e anno) \_\_\_\_\_

La persona che assiste ha la tracheostomia Sì ☐ No ☐ Da quanti mesi? \_\_\_\_\_

La persona che assiste ha la gastrostomia (PEG) Sì ☐ No ☐ Da quanti mesi? \_\_\_\_\_

Data di inizio assistenza al familiare (mese e anno) \_\_\_\_\_

Ore assistenza settimanale <10 ☐ 10-20 ☐ 21-30 ☐ 31-40 ☐ 41-50 ☐ > 50 ☐

Le chiedo di indicare per le seguenti affermazioni quanto è d'accordo o in disaccordo con ognuna di esse

|   |                                                                                                                                     | Fortemente<br>in disaccordo |   |   |   |   |   |   |   |   |   |  |  |  |  | Fortemente<br>d'accordo |
|---|-------------------------------------------------------------------------------------------------------------------------------------|-----------------------------|---|---|---|---|---|---|---|---|---|--|--|--|--|-------------------------|
| 1 | Ritiene che il suo familiare le chieda un aiuto maggiore rispetto a quello di cui ha bisogno?                                       | 0                           | 1 | 2 | 3 | 4 | 5 | 6 | 7 | 8 | 9 |  |  |  |  | 10                      |
| 2 | Ritiene di non avere abbastanza tempo per sé stesso a causa del tempo impegnato nella cura del suo familiare?                       | 0                           | 1 | 2 | 3 | 4 | 5 | 6 | 7 | 8 | 9 |  |  |  |  | 10                      |
| 3 | Si sente stressato dall'avere cura del suo familiare e dal cercare di fare fronte alle altre responsabilità, familiari e di lavoro? | 0                           | 1 | 2 | 3 | 4 | 5 | 6 | 7 | 8 | 9 |  |  |  |  | 10                      |
| 4 | Si sente in imbarazzo per il comportamento del suo familiare?                                                                       | 0                           | 1 | 2 | 3 | 4 | 5 | 6 | 7 | 8 | 9 |  |  |  |  | 10                      |

|    |                                                                                                                                              |   |   |   |   |   |   |   |   |   |   |    |
|----|----------------------------------------------------------------------------------------------------------------------------------------------|---|---|---|---|---|---|---|---|---|---|----|
| 5  | Si sente arrabbiato quando è con il suo familiare?                                                                                           | 0 | 1 | 2 | 3 | 4 | 5 | 6 | 7 | 8 | 9 | 10 |
| 6  | Ritiene che il suo familiare influisca attualmente in maniera negativa sul suo rapporto con gli altri membri della famiglia e con gli amici? | 0 | 1 | 2 | 3 | 4 | 5 | 6 | 7 | 8 | 9 | 10 |
| 7  | Teme ciò che il futuro riserva al suo familiare?                                                                                             | 0 | 1 | 2 | 3 | 4 | 5 | 6 | 7 | 8 | 9 | 10 |
| 8  | Sente che il suo familiare è dipendente da lei?                                                                                              | 0 | 1 | 2 | 3 | 4 | 5 | 6 | 7 | 8 | 9 | 10 |
| 9  | Si sente teso quando assiste il suo familiare?                                                                                               | 0 | 1 | 2 | 3 | 4 | 5 | 6 | 7 | 8 | 9 | 10 |
| 10 | Ritiene che la sua salute ne abbia risentito a causa del prendersi cura del suo familiare?                                                   | 0 | 1 | 2 | 3 | 4 | 5 | 6 | 7 | 8 | 9 | 10 |
| 11 | Ritiene di non avere la vita privata che vorrebbe a causa dell'assistenza al suo familiare?                                                  | 0 | 1 | 2 | 3 | 4 | 5 | 6 | 7 | 8 | 9 | 10 |
| 12 | Ritiene che la sua vita sociale abbia risentito dal prendersi cura del suo familiare?                                                        | 0 | 1 | 2 | 3 | 4 | 5 | 6 | 7 | 8 | 9 | 10 |
| 13 | Si sente a disagio ad invitare a casa gli amici a causa del suo familiare?                                                                   | 0 | 1 | 2 | 3 | 4 | 5 | 6 | 7 | 8 | 9 | 10 |
| 14 | Ritiene che il suo familiare si aspetti che lei si prenda cura di lui come se fosse l'unica persona da cui dipende?                          | 0 | 1 | 2 | 3 | 4 | 5 | 6 | 7 | 8 | 9 | 10 |
| 15 | Sente di non aver abbastanza denaro per prendersi cura del suo familiare in aggiunta alle sue spese personali?                               | 0 | 1 | 2 | 3 | 4 | 5 | 6 | 7 | 8 | 9 | 10 |

|    |                                                                                                       |   |   |   |   |   |   |   |   |   |   |    |
|----|-------------------------------------------------------------------------------------------------------|---|---|---|---|---|---|---|---|---|---|----|
| 16 | Pensa di non farcela a prendersi cura del suo familiare ancora per molto tempo?                       | 0 | 1 | 2 | 3 | 4 | 5 | 6 | 7 | 8 | 9 | 10 |
| 17 | Pensa di non avere più il controllo della sua vita dal momento in cui il suo familiare si è ammalato? | 0 | 1 | 2 | 3 | 4 | 5 | 6 | 7 | 8 | 9 | 10 |
| 18 | Desidererebbe affidare la cura del suo familiare a qualcun altro?                                     | 0 | 1 | 2 | 3 | 4 | 5 | 6 | 7 | 8 | 9 | 10 |
| 19 | Si sente insicuro su cosa fare per il suo familiare?                                                  | 0 | 1 | 2 | 3 | 4 | 5 | 6 | 7 | 8 | 9 | 10 |
| 20 | Sente che dovrebbe fare di più per il suo familiare?                                                  | 0 | 1 | 2 | 3 | 4 | 5 | 6 | 7 | 8 | 9 | 10 |
| 21 | Crede che potrebbe fare di meglio nella cura del suo familiare?                                       | 0 | 1 | 2 | 3 | 4 | 5 | 6 | 7 | 8 | 9 | 10 |
| 22 | Nel complesso, si sente sovraccaricato dall'aver cura del suo familiare?                              | 0 | 1 | 2 | 3 | 4 | 5 | 6 | 7 | 8 | 9 | 10 |

Vorremmo infine porle alcune brevi domande relative al periodo dell'emergenza COVID-19

|    |                                                                                     | Fortemente<br>in disaccordo |   |   |   |   |   |   |   |   |   |    | Fortemente<br>d'accordo |
|----|-------------------------------------------------------------------------------------|-----------------------------|---|---|---|---|---|---|---|---|---|----|-------------------------|
| 23 | Sente che l'emergenza COVID-19 abbia peggiorato la sua qualità di vita?             | 0                           | 1 | 2 | 3 | 4 | 5 | 6 | 7 | 8 | 9 | 10 |                         |
| 24 | Si è sentito solo rispetto a prima dell'emergenza?                                  | 0                           | 1 | 2 | 3 | 4 | 5 | 6 | 7 | 8 | 9 | 10 |                         |
| 25 | Ritiene che il familiare che assiste abbia avuto cure adeguate durante l'emergenza? | 0                           | 1 | 2 | 3 | 4 | 5 | 6 | 7 | 8 | 9 | 10 |                         |

|    |                                                                                          |   |   |   |   |   |   |   |   |   |   |    |
|----|------------------------------------------------------------------------------------------|---|---|---|---|---|---|---|---|---|---|----|
| 26 | Ha avuto supporto<br>psicologico adeguato<br>durante l'emergenza?                        | 0 | 1 | 2 | 3 | 4 | 5 | 6 | 7 | 8 | 9 | 10 |
| 27 | Sente di non aver<br>potuto svolgere alcune<br>attività che per lei<br>erano importanti? | 0 | 1 | 2 | 3 | 4 | 5 | 6 | 7 | 8 | 9 | 10 |
| 28 | Il rapporto con la persona<br>che assiste è stato più<br>difficile?                      | 0 | 1 | 2 | 3 | 4 | 5 | 6 | 7 | 8 | 9 | 10 |
| 29 | Si è sentito sostenuto?                                                                  | 0 | 1 | 2 | 3 | 4 | 5 | 6 | 7 | 8 | 9 | 10 |
